# Supplementary material for: Structural and thermodynamic properties of bulk triglycerides and triglyceride/water mixtures reproduced using a polarizable coarse-grained model
Source: Royal Society of Chemistry journal article supplement (doi:10.1039/d3cp01839c), 2023-01-01
Supplement: d3cp01839c1.pdf [file d3cp01839c1.pdf]

Supporting information: Structural and thermodynamic properties of the  
bulk triglycerides and triglyceride/water mixture reproduced by a  
polarizable coarse-grained model

Ming Ma,<sup>a</sup> Junjie Song,<sup>a</sup> Yi Dong,<sup>a</sup> Weihai Fang,<sup>a</sup> and Lianghui Gao<sup>\*a</sup>

<sup>a</sup>Key Laboratory of Theoretical and Computational Photochemistry, Ministry of Education, College of Chemistry, Beijing Normal University, 19 Xin-Jie-Kou-Wai Street, Beijing 100875, China.

\*Correspondence to: Lianghui Gao (E-mail: [lhgao@bnu.edu.cn](mailto:lhgao@bnu.edu.cn))

**Table S1** Accuracy tests of three different AA FFs for predicting  $\rho$  and  $\Delta H_{\text{vap}}$  of n-octane (C04-C04), (Z)-oct-2-ene (B03-C04), (Z)-hept-2-ene (B03-C03), and methyl butanoate (B06-C03)

| Molecules        | CG names | Force field   | $\rho$ (kg/m <sup>3</sup> ) |     |            | $\Delta H_{\text{vap}}$ (kJ/mol) |      |            |
|------------------|----------|---------------|-----------------------------|-----|------------|----------------------------------|------|------------|
|                  |          |               | Sim                         | Exp | $ \delta $ | Sim                              | Exp  | $ \delta $ |
| n-octane         | C04-C04  | GROMOS54a7-UA | 707                         |     | 1.2%       | 43.7                             |      | 5.3%       |
|                  |          | GROMOS54a7-AA | 734                         | 699 | 5.1%       | 47.8                             | 41.5 | 15%        |
|                  |          | OPLS-AA       | 694                         |     | 0.1%       | 46.1                             |      | 11%        |
| (Z)-oct-2-ene    | B03-C04  | GROMOS54a7-UA | 723                         |     | 0.4%       | 42.3                             |      | 5.3%       |
|                  |          | GROMOS54a7-AA | 752                         | 720 | 4.4%       | 44.7                             | 40.2 | 11%        |
|                  |          | OPLS-AA       | 710                         |     | 1.4%       | 44.8                             |      | 11%        |
| (Z)-hept-2-ene   | B03-C03  | GROMOS54a7-UA | 707                         |     | 0.6%       | 37.2                             |      | 2.5%       |
|                  |          | GROMOS54a7-AA | 735                         | 703 | 4.6%       | 40.0                             | 36.3 | 10%        |
|                  |          | OPLS-AA       | 691                         |     | 1.7%       | 38.7                             |      | 6.6%       |
| methyl butanoate | B06-C03  | GROMOS54a7-UA | 884                         |     | 0.7%       | 44.7                             |      | 11%        |
|                  |          | GROMOS54a7-AA | 971                         | 890 | 9.2%       | 54.1                             | 40.3 | 34%        |
|                  |          | OPLS-AA       | 879                         |     | 1.2%       | 44.6                             |      | 11%        |

Sim, Exp and  $|\delta|$  refer to results obtained from simulations, experiments and corresponding relative deviations. Experimental  $\rho$  are from ref. 1, 2 and experimental  $\Delta H_{\text{vap}}$  are from ref. 1, 3, 4.

**Table S2** Accuracy tests of OPLS-AA FF for predicting  $\rho$  and  $\Delta H_{\text{vap}}$  of methyl formate (B06) and (Z)-but-2-ene (B03)

| Molecules      | CG names | $\rho$ (kg/m <sup>3</sup> ) |     |          | $\Delta H_{\text{vap}}$ (kJ/mol) |      |          |
|----------------|----------|-----------------------------|-----|----------|----------------------------------|------|----------|
|                |          | Sim                         | Exp | $\delta$ | Sim                              | Exp  | $\delta$ |
| methyl formate | B06      | 931                         | 967 | 3.8%     | 28.2                             | 28.4 | 0.7%     |
| (Z)-but-2-ene  | B03      | 600                         | 617 | 2.8%     | 22.9                             | 22.2 | 3.0%     |

Experimental  $\rho$  are from ref. 1, 2 and experimental  $\Delta H_{\text{vap}}$  are from ref. 1, 3, 4

**Table S3** Nonbonded parameters of TG and PCGW

| Nonbonded parameters | $\epsilon$ (kJ/mol) | $R_0$ (nm) | $\alpha$ | $\beta$ |
|----------------------|---------------------|------------|----------|---------|
| B06~B06 <sup>a</sup> | 5.207               | 0.504      | 7.638    | 17.538  |
| B06~B03 <sup>a</sup> | 4.791               | 0.534      | 9.195    | 16.399  |
| B06~C04 <sup>a</sup> | 4.087               | 0.548      | 9.887    | 15.811  |
| B06~C03              | 3.047               | 0.549      | 10.639   | 14.451  |
| B03~B03 <sup>a</sup> | 4.409               | 0.565      | 11.070   | 15.334  |
| B03~C04              | 4.127               | 0.560      | 11.903   | 14.784  |
| B03~C03              | 3.480               | 0.548      | 11.254   | 13.512  |
| C04~C04              | 4.357               | 0.578      | 12.798   | 14.254  |
| C04~C03 <sup>a</sup> | 3.671               | 0.556      | 12.101   | 13.028  |
| C03~C03 <sup>a</sup> | 3.091               | 0.534      | 11.442   | 11.907  |
| B06~WO               | 5.078               | 0.570      | 7.566    | 12.809  |
| B03~WO               | 4.050               | 0.580      | 9.108    | 11.977  |
| C04~WO <sup>b</sup>  | 3.448               | 0.554      | 9.793    | 11.548  |
| C03~WO <sup>b</sup>  | 2.797               | 0.539      | 9.260    | 10.554  |
| WO~WO <sup>b</sup>   | 5.209               | 0.594      | 7.494    | 9.355   |

<sup>a</sup> Non-bonded parameters are directly obtained from ref.5, <sup>b</sup> Non-bonded parameters are directly obtained from ref. 6.

**Table S4** Bonded parameters of TG

| Bond                 | $L_0$ (nm) | $k_b$ (kJ/mol/nm <sup>2</sup> ) | Angle       | $\vartheta_0$ (°) | $k_a$ (kJ/mol) |
|----------------------|------------|---------------------------------|-------------|-------------------|----------------|
| B06-B06 <sup>a</sup> | 0.400      | 1250                            | B03-C04-C04 | 164               | 25             |
| C04-C04              | 0.460      | 2500                            | C03-B03-C04 | 132               | 25             |
| B03-C04              | 0.447      | 2500                            | B06-C03-B03 | 163               | 25             |
| B03-C03              | 0.400      | 2500                            |             |                   |                |
| B06-C03              | 0.360      | 1250                            |             |                   |                |

<sup>a</sup> Bonded parameters are directly obtained from ref. 5.

**Table S5** Effects of the thickness of TG layer on the proportions of various TG conformations inside the bulk phase and at the TG/water interfaces, water content penetrating into the TG-rich phase, and interfacial tension

| Conformations (%)               | 256 TGs + 6081 PCGWs |                       | 512 TGs+6081 PCGWs   |                       | 1024 TGs + 6081 PCGWs |                       |
|---------------------------------|----------------------|-----------------------|----------------------|-----------------------|-----------------------|-----------------------|
|                                 | In bulk (~116 TGs)   | At surface (~140 TGs) | In bulk (~372 TGs)   | At surface (~140 TGs) | In bulk (~887 TGs)    | At surface (~137 TGs) |
| Propeller                       | 24.56                | 8.70                  | 24.53                | 8.74                  | 25.28                 | 8.52                  |
| Tuning fork                     | 18.71                | 9.66                  | 17.68                | 10.49                 | 18.96                 | 9.17                  |
| Chair                           | 22.09                | 12.84                 | 24.98                | 12.19                 | 23.41                 | 13.61                 |
| Trident                         | 34.64                | 68.80                 | 32.81                | 68.58                 | 32.35                 | 68.70                 |
|                                 | 256 TGs + 6081 PCGWs |                       | 512 TGs + 6081 PCGWs |                       | 1024 TGs + 6081 PCGWs |                       |
| Number of PCGW in bulk TG phase | 2.5                  |                       | 7.5                  |                       | 16.0                  |                       |
| $\Delta G_p$ ( $k_B T$ )        | 7.6                  |                       | 6.6                  |                       | 7.1                   |                       |
| $\gamma_{TG/w}$ (mN/m)          | 33.6                 |                       | 32.9                 |                       | 31.5                  |                       |

Simulation settings of three TG/water systems are strictly identical except for the thickness of TG bulk phase.

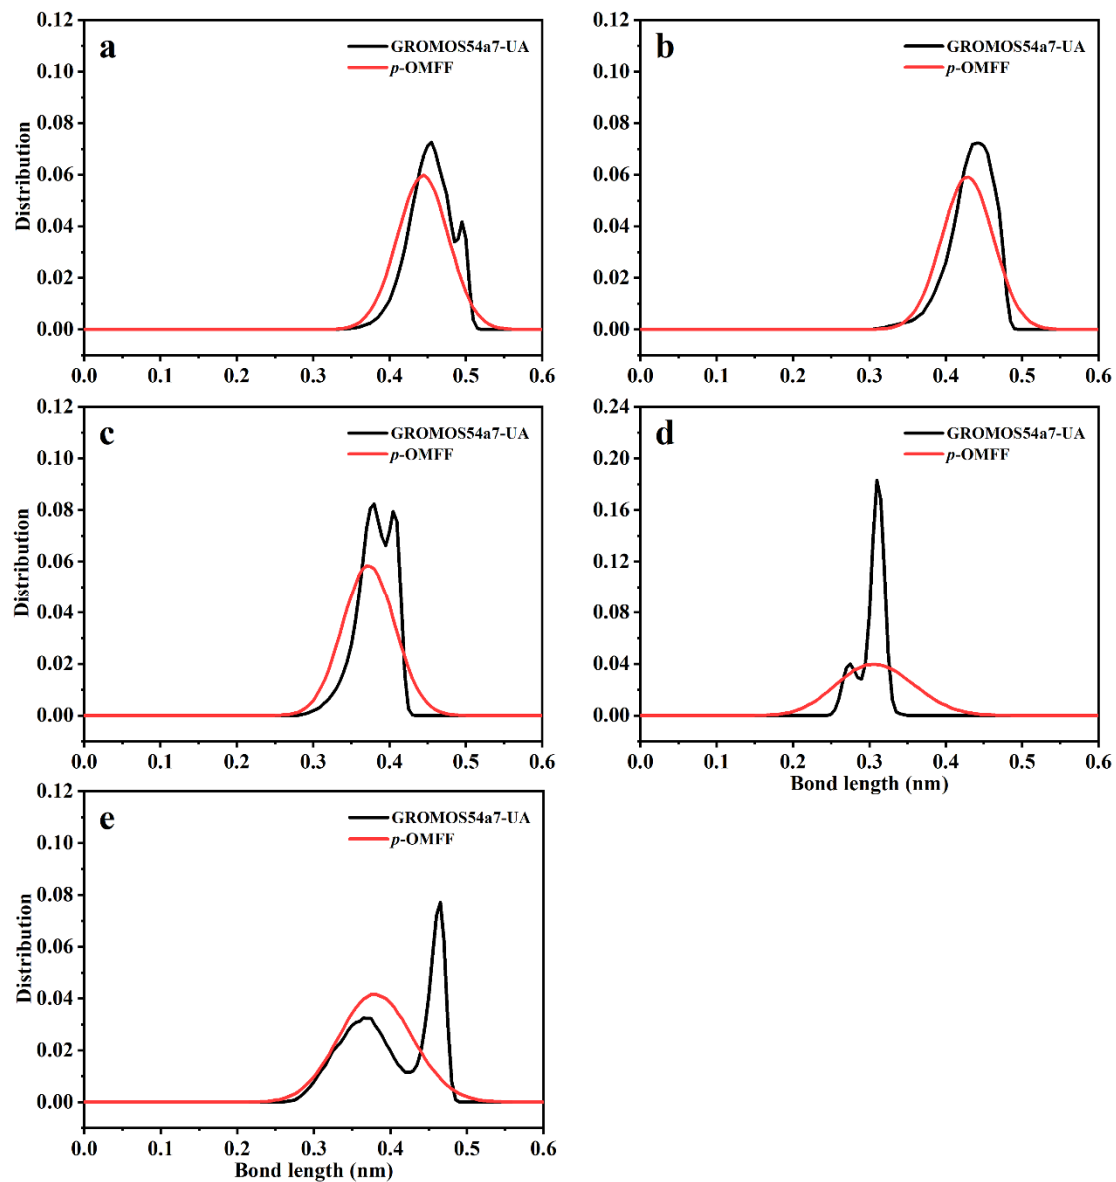

**Fig. S1** Bond length distributions of C04-C04 (a), B03-C04 (b), B03-C03 (c), B06-C03 (d), and B06-B06 (e) of TG obtained from AA and CG MD simulations.

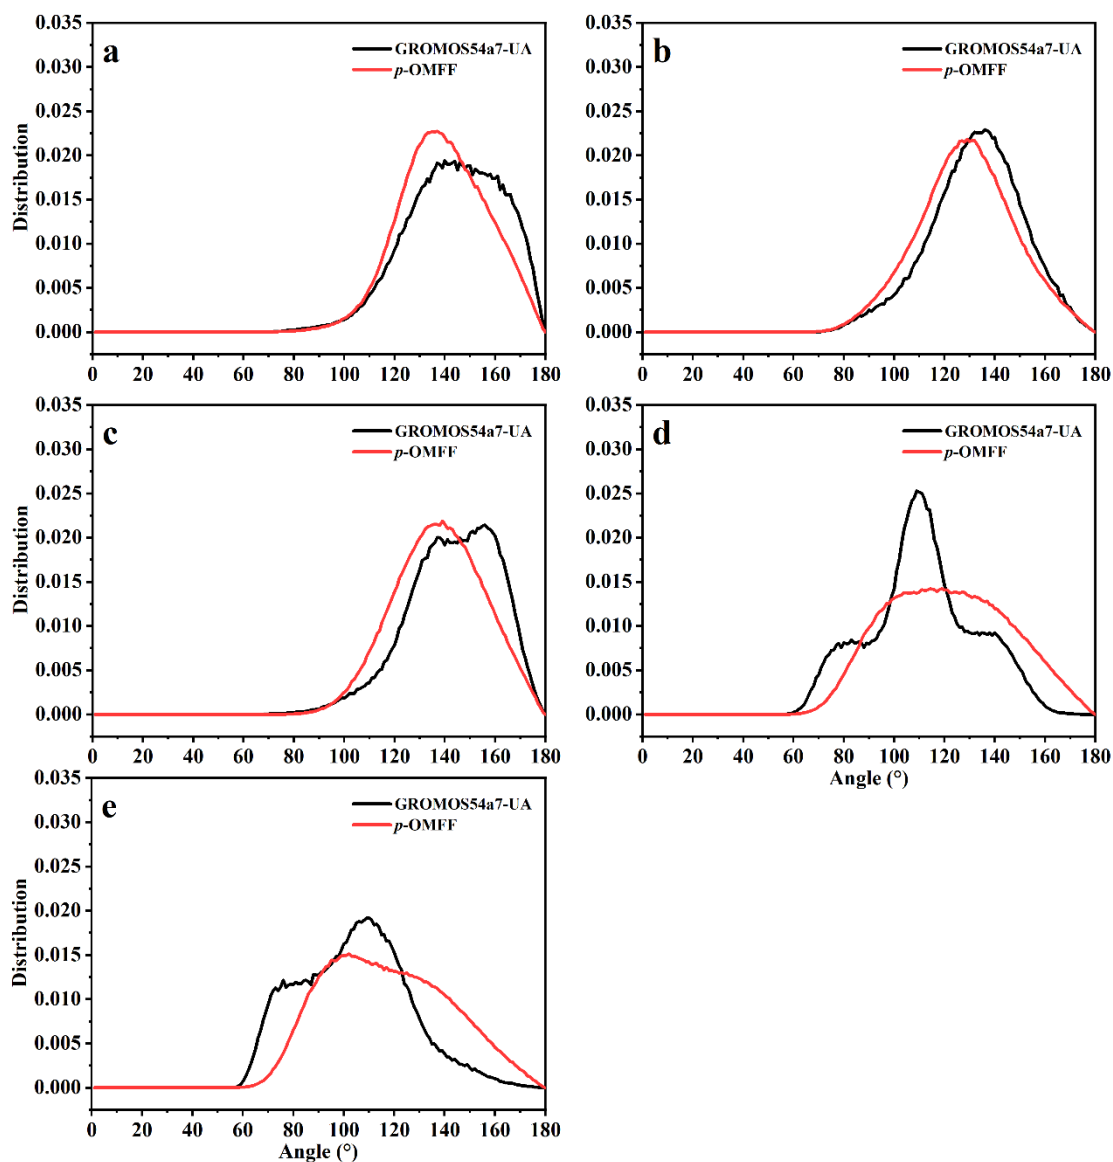

**Fig. S2** Angle distributions of B03-C04-C04 (a), C03-B03-C04 (b), B06-C03-B03 (c), B06-B06-C03 (d), and C03-B06-B06 (e) of TG obtained from AA and CG MD simulations. In (d), C03 bead locates in the first or the third fatty acyl chain; in (e), C03 bead locates in the second fatty acyl chain. See Figure 2 for the definition of the order of the chain

## References

- 1 C. L. Yaws, *Thermophysical properties of chemicals and hydrocarbons*, 2th Edition, William Andrew, Beaumont, 2014.
- 2 Yaws, C. L., *The Yaws handbook of vapor pressure: Antoine coefficients: Second Edition*. **2015**.
- 3 Chickos, S. James, Enthalpies of Vaporization of Organic and Organometallic Compounds, 1880–2002, *J. Phys. Chem. Ref. Data*, 2003, **32** (2), 519–878.
- 4 E. By, *CRC Handbook of Chemistry and Physics*, 97th Edition, 2016.
- 5 J. Song, M. Wan, Y. Yang, L. Gao, W. Fang, Development of accurate coarse-grained force fields for weakly polar groups by an indirect parameterization strategy, *Phys. Chem. Chem. Phys.*, 2021, **23** (11), 6763–6774.
- 6 J. Song, M. Ma, Y. Dong, M. Wan, W. Fang, L. Gao, Coarse-Grained Force Field for Polyethylene Oxide and Polyethylene Glycol Aqueous Solutions Based on a Polarizable Water Model, *J. Chem. Theory Comput.*, 2023, **19** (6), 1864–1874.
